# Supplementary material for: Polycyclitol derivatives restore long- term memory via cdk5/p25 activation of tau signaling in experimental cerebral malaria
Source: Research Square preprint supplement (doi:10.21203/rs.3.rs-6559340/v1), 2025-05-13
Supplement: Supplementary file 1 [file 911fe4344f391619bc0ae9c4.docx]

Power analysis for the calculation of the number of animals required per experimental group.

We performed the power analyses for the comparison of the animals between PbA infected and the ARM treated based on the survivability pattern reported from the previous data i.e. 10 percent (0.1 proportions) of mice survive from cerebral malaria without symptoms and approximately 60 percent (0.6 proportion) of them survive after treatment with ARM therefore the effect size could be 0.1 - 0.6 = -0.5 Sample size = 2 (Zα/2 + Zβ)2 × P (1 − P)/(p1 − p2)2

According to the values as per the z-table at type -1 error of 5%

Zα/2 = 1.96

Zβ = 0.842 at 80 % power

p1 − p2 = Difference in proportion of events in two groups

p= pooled preference

At 5 percent of significance level and 80 % power,

Sample size = 2x(1.96+.842) 2 x 0.45 (1-0.5)/(-0.5)2

= 10.08

Therefore, approximately 10 to 12 animals per group will be needed.
